# Supplementary material for: A High-Throughput Screening Platform of Microbial Natural Products for the Discovery of Molecules with Antibiofilm Properties against Salmonella
Source: Front Microbiol. 2017 Mar 2;8:326. doi: 10.3389/fmicb.2017.00326 (PMC5332434; doi:10.3389/fmicb.2017.00326)
Supplement: Table S1 — Activities shown by the 40 pre-selected extracts confirmed by cherrypicking. The data indicates the percentage of inhibition of biofilm formation determined by resazurin (viability) and OD612 measures (total biomass), and the percentage of dispersal of preformed biofilm determined by resazurin (viability) and CV staining (biofilm biomass), in the screening and cherry-picking campaigns. Day 1 and 2 refers to the data obtained independently in 2 different days. In red, cytotoxicity levels on HepG2 cells higher than 30% are shown. [file Table1.xlsx]

## Sheet: Table S1 
	Table S1. Activities shown by the 40 pre-selected extracts confirmed by cherrypicking.
		FORMATION ASSAY Screening				FORMATION ASSAY Cherry-picking				DISPERSAL ASSAY Screening				BIOFILM DISPERSAL ASSAY Cherry-picking				ACTIVITY CODEa				CYTOTOXICITY
		DAY 1		DAY 2		DAY 1		DAY 2		DAY 1		DAY 2		DAY 1		DAY 2		1	2	3	4	HepG2 % Cell death
	#	% viability	% total biomass	% viability	% total biomass	% viability	% total biomass	% viability	% total biomass	% viability	% biofilm biomass	% viability	% biofilm biomass	% viability	% biofilm biomass	% viability	% biofilm biomass
	2 (D)	-84.8848	168	-83.7729	128.163	-99.5396	266.272	-93.6907	129.775	-45.5477	-42.8328	-38.6566	-32.9006	-29.0564	-56.0897	-26.5387	-55.0442	●			●	-51.6
	5 (D)	-92.6965	18	-60.9792	-68.5714	-90.5212	23.6686	-41.5765	-38.764	-59.5329	-37.9506	-48.472	-46.63	-39.6804	-52.2929	-31.111	-30.0295		●	●		-18.44
	6 (F)	-96.1278	-26	-85.2331	461.947	-87.4359	91.1243	-90.7488	398.315	-48.227	-35.2285	-27.8483	-17.3232	-40.4664	-56.5828	-39.2004	-58.8201	●			●	25.61
	7 (D)	-8.35526	-43	3.81771	28.3186	-16.9499	71.0059	-16.6573	16.2921	-45.519	-48.4591	-34.5344	-47.9829	-21.4986	-44.7978	-30.5938	-43.9528				●	-25.76
	8 (F)	-99.9624	8	-100.044	90.2655	-85.1861	71.0059	-76.8797	55.618	-46.2375	-33.7407	-27.8214	-32.4632	-37.8493	-56.6815	-31.4006	-54.9263	●			●	8.67
	9 (F)	-93.5902	17	-93.5039	30.0885	-88.0435	94.6746	-83.6144	175.843	-14.6081	18.2253	-3.31164	18.13	-20.1771	21.1785	-6.14979	10.6195	●				-99.39
	10 (F)	-93.5467	278	-90.241	276.168	-96.3879	337.278	-85.4185	245.506	-4.8654	1.84416	-0.00448672	10.0905	-0.155474	8.50592	19.1011	12.2714	●				-30.57
	11 (F)	-99.2206	72	-97.585	237.851	-98.3245	328.994	-94.3365	120.787	-10.1826	2.93507	0.0493539	-3.13153	-2.55668	13.8314	20.5907	16.9911	●				-18.24
	12 (F)	-98.0969	246	-94.4742	195.755	-99.8434	340.828	-97.668	112.921	-25.5969	-33.0355	-11.9901	-23.4409	-4.84561	-18.0227	10.6082	-24.3658	●			●	9.37
	13 (F)	-99.4391	73	-99.6936	104.245	-100.546	73.3728	-99.5746	-42.1348	-26.2764	-41.5247	-22.1302	-41.1231	-21.4813	-31.3363	-19.7528	-37.8171	●			●	-46.88
	15 (F)	-95.5017	758	-96.2808	247.881	-85.4139	196.45	-94.316	145.506	-2.59711	20.2026	3.60217	18.0507	1.10559	25.4684	15.9977	23.0678	●				14.51
	16 (F)	-98.554	26	-96.0829	145.339	-92.4103	145.562	-95.6179	162.359	-16.5241	-15.8316	-15.6883	-21.8299	-24.3058	-13.7327	2.012	-7.96461	●			●	-1.03
	17 (F)	-97.6107	634	-100.064	280.932	-96.4923	281.657	-97.217	362.36	-18.4981	-45.7356	0.806048	-36.3998	-1.90888	-39.2258	-2.78783	-43.4808	●			●	-53.05
	18 (F)	-95.1012	178	-99.1328	-184.322	-98.7517	151.479	-96.7044	73.5955	-41.8312	-54.8507	-24.8691	-49.7762	-46.0808	-57.3225	-37.8349	-59.646		●	●		-65.89
	19 (F)	-99.2925	-694	-97.8174	196.186	-96.6157	146.746	-96.8479	87.0787	-41.3763	-51.6525	-21.7633	-45.6987	-51.7296	-44.9458	-38.2383	-48.7906	●			●	-61.91
	21 (F)	-97.762	735	-93.3706	294.491	-97.2897	473.373	-97.955	409.551	-5.79005	-46.4819	-1.82613	-47.2899	-7.04815	-35.0838	3.96711	-32.6844	●			●	-42.51
	22 (F+D)	-94.4071	279	-90.3906	22.4576	-87.4929	59.1716	-70.7908	61.236	-48.49	-43.2303	-37.5837	-47.9363	-20.799	-33.9004	-11.2393	-39.764	●			●	-96.98
	23 (F)	-96.5112	222	-93.7823	232.18	-88.8219	357.397	-92.7682	499.438	-3.03611	-0.163489	-0.296411	2.09175	1.37335	26.1095	23.032	25.4277	●				-37.89
	25 (F+D)	-100.307	-103	-101.659	-99.308	-100.926	-110.059	-100.446	-100.562	-92.3207	-35.4223	-93.2053	-42.7858	-70.2138	-28.7229	-64.4823	-28.2006		●	●		-100.06
	26 (F)	-93.3832	427	-95.5571	259.862	-93.5305	342.012	-85.4697	509.551	-0.945076	-3.48774	-0.123125	-10.4588	-2.15072	10.9221	18.9976	18.2301	●				-45.85
	31 (F+D)	-92.9094	-96	-91.8775	-100.995	-70.2535	62.7219	-57.9365	75.8427	-51.6393	-55.8784	-47.0192	-52.8311	-36.0786	-49.926	-40.4417	-49.0855		●	●		17.4746
	32 (D)	-88.1028	115	-82.0182	26.3681	-100.337	-53.2544	-98.242	9.55057	-61.0216	-57.2647	-49.0154	-49.788	-43.0145	-72.214	-35.0005	-65.6637	●			●	18.1927
	33 (F)	-98.1843	213	-99.2074	331.25	-96.7771	140.828	-98.8161	227.528	-23.522	1.46438	-11.1307	18.4791	-5.16519	66.4941	15.1598	18.6431	●				-6.12789
	34 (F)	-99.3339	276	-98.7722	287.019	-99.0744	177.515	-99.2773	273.596	-13.6251	-1.85863	-6.06751	11.3678	-5.54524	10.6262	20.5079	9.9705	●				-6.12789
	35 (F)	-100.083	145	-99.9112	158.986	-100.024	268.639	-99.8206	339.888	-11.8996	8.91395	-4.88191	23.2667	-3.93004	23.3481	19.5355	14.1593	●				5.94228
	36 (F)	-99.8043	173	-98.8875	170.968	-97.8498	69.8225	-97.9345	94.9438	-15.9888	-7.01844	-6.31667	6.95923	-7.4282	7.96351	15.2115	7.07964	●				-31.296
	37 (F)	-99.6912	142	-98.7726	163.594	-98.7991	373.964	-91.7021	375.843	-17.2218	-1.43442	-11.2824	13.6069	2.29756	23.1016	18.439	21.1209	●				-22.807
	38 (F)	-99.552	256	-99.8485	170.046	-97.8213	171.598	-97.6167	175.843	-15.43	19.7234	-5.93469	10.0753	-5.2602	6.33629	18.077	8.37758	●				-32.4278
	39 (F)	-99.7086	119	-99.5665	167.281	-98.1536	158.58	-97.8833	142.135	-7.10072	-5.84016	-2.16146	3.42768	-5.98575	57.8156	13.8874	15.6342	●				-32.2015
	40 (D)	-97.2042	269	-86.2309	98.2979	-99.3877	155.03	-96.8172	118.539	-44.1734	-51.3499	-46.106	-47.6363	-31.9931	-65.212	-31.4317	-59.351	●			●	-51.0662
	41 (D)	-85.261	27	-49.9393	48.3516	-54.6753	106.509	-44.1187	118.539	-48.8079	-53.5073	-42.2878	-55.8187	-30.9393	-49.8767	-42.2106	-49.4395	●			●	41.7666
	42 (D)	-79.11	114	-51.5751	90.8425	-60.6655	170.414	-38.4398	181.461	-50.227	-46.8294	-44.5531	-47.5681	-35.1803	-59.7387	-44.5795	-55.2802	●			●	60.1893
	43 (D)	-65.8294	80	-28.8956	52.0146	1.12493	62.7219	12.926	89.3258	-55.6476	-38.6364	-41.5829	-37.0257	-22.9929	-39.5217	-35.5281	-40	●			●	-44.5426
	44 (D)	-98.5601	106	-98.4856	63.0037	-99.2738	132.544	-98.3958	166.854	-58.2213	-62.3737	-46.9311	-53.7306	-47.6096	-64.4724	-49.1931	-66.0767	●			●	-62.9653
	45 (D)	-79.0555	40	-72.0132	85.9155	-51.8369	143.195	-34.7086	143.258	-52.6892	-49.8451	-45.3757	-44.3299	-32.304	-49.6795	-40.7831	-45.7817	●			●	7.65662
	46 (D)	-93.6587	-1	-82.1173	36.6197	-66.4657	86.3906	-58.9719	101.685	-63.4943	-63.0808	-54.443	-49.8282	-37.9357	-62.4507	-46.4208	-60.531	●			●	6.03248
	47 (D)	-87.3684	79	-87.0729	61.9718	-81.835	97.0414	-66.8136	143.258	-59.2012	-56.4348	-48.5125	-50.8855	-35.6294	-51.9477	-43.9485	-54.1003	●			●	-104.408
	48 (D)	-90.1331	11	-87.1643	108.451	-80.8003	85.2071	-71.5596	61.236	-57.5226	-52.9992	-39.651	-42.0037	-33.8847	-64.6696	-35.1453	-61.5929	●			●	-54.8724
	49 (D)	-86.589	102	-80.3706	90.8451	-71.0319	95.858	-60.1917	219.663	-55.5448	-62.6302	-41.1214	-57.3883	-27.3375	-51.7012	-37.928	-53.3333	●			●	-103.596
	50 (F)	-99.8748	8	-97.9893	156.338	-96.5208	125.444	-94.0905	232.023	-34.3495	-52.7176	-20.7323	-40.9992	-18.1991	-52.145	-24.4802	-55.1033	●			●	-9.62877
	a. 1) inhibition of biofilm formation, 2) antimicrobial activity of cells in suspension, 3) antimicrobial activity of cells that are part of the biofilm and 4) dispersal of the biofilm. The activity detected is indicated with a black circle (●).
	n.d. not determined. The scale of colors indicate the percentage of viability, from red (less viability) to green (more viability).
	F: Formation; D: Dispersal; F+D: Formation and Dispersal
	The data indicates the percentage of inhibition of biofilm formation determined by RSZ (viability) and OD612 (total biomass), and the percentage of dispersal of preformed biofilm determined by RSZ (viability) and CV staining (biofilm biomass),
	in the screening and cherry-picking campaigns. Day 1 and day 2 refers to the data obtained independently in two different days. In red, cytotoxicity levels on HepG2 cells higher than 30% are shown.
